# Supplementary material for: Exploring personalized psychotherapy for depression: A system dynamics approach
Source: PubMed Central journal article supplement (PMC9612473; doi:10.1371/journal.pone.0276441), 2022-10-27
Supplement: pone.0276441.s003.pdf [file pone.0276441.s003.pdf]

**S1 Table. Model Formulations.**

| <b>Formulations</b>                                                                    | <b>Units</b>             |
|----------------------------------------------------------------------------------------|--------------------------|
| <i>Adjusted Stressor0=Stressor0*Memory Time/Masurement time</i>                        | <i>engram</i>            |
| <i>Change in PinkNoise MDD=(WhiteNoise MDD-PinkNoise MDD) / <math>\Theta</math>12</i>  | <i>DepScore/Month</i>    |
| <i>Change in PinkNoise Rum= (WhiteNoise Rum-PinkNoise Rum) / <math>\Theta</math>12</i> | <i>RumScore/Month</i>    |
| <i>Effect of Rumination on memory time=1.4741</i>                                      | <i>1/RumScore</i>        |
| <i>Fraction of Stimuli Negatively Perceived= 1</i>                                     | <i>Disruption/engram</i> |
| <i>Gender=GET XLS CONSTANTS( 'AdolescentData.xlsx' , 'Sheet1' , 'B2')</i>              | <i>Dmnl</i>              |

|                                                                                                                                                                                                                                  |                     |
|----------------------------------------------------------------------------------------------------------------------------------------------------------------------------------------------------------------------------------|---------------------|
| <i>Indicated MDD</i> = $\max(0, (\theta_6 + \theta_7 * \text{Rumination}) / (1 - \theta_8) + \text{PinkNoise MDD} * \text{MDDSwitch})$                                                                                           | <i>DepScore</i>     |
| <i>Indicated Rumination</i> = $\max(0, (\theta_1 + \theta_2 * \text{Depressive symptoms} + \theta_3 * \text{Gender} + \theta_4 * \text{Perceived Negative Stimuli}) / (1 - \theta_5) + \text{PinkNoise Rum} * \text{RumSwitch})$ | <i>RumScore</i>     |
| <i>Let it go</i> =( <i>past stressors kept alive</i> )/ <i>Memory Time</i>                                                                                                                                                       | <i>engram/Month</i> |
| <i>Depressive symptoms</i> = <i>SMOOTH</i> ( <i>Indicated MDD</i> , <i>Minimum Adjustment time</i> /(1- $\theta_8$ ), <i>MDD0</i> )                                                                                              | <i>DepScore</i>     |
| <i>MDD0</i> = <i>GET XLS CONSTANTS</i> ( ' <i>AdolescentData.xlsx</i> ' , ' <i>Sheet1</i> ' , ' <i>B4</i> ' )                                                                                                                    | <i>DepScore</i>     |
| <i>MDDResidualMean</i> =0                                                                                                                                                                                                        | <i>DepScore</i>     |
| <i>MDDSwitch</i> =0                                                                                                                                                                                                              | <i>Dmnl</i>         |

|                                                                                                       |                   |
|-------------------------------------------------------------------------------------------------------|-------------------|
| <i>Measurement time=6</i>                                                                             | <i>Month</i>      |
| <i>Memory Time=Minimum Memory Time*Rumination* <math>\Theta</math></i>                                | <i>Month</i>      |
| <i>Minimum Adjustment time=1</i>                                                                      | <i>Month</i>      |
| <i>Minimum Memory Time=1</i>                                                                          | <i>Month</i>      |
| <i>NoiseSeedMDD=3</i>                                                                                 | <i>Dmnl</i>       |
| <i>NoiseSeedRum=2</i>                                                                                 | <i>Dmnl</i>       |
| <i>Perceived Negative Stimuli=past stressors kept alive *Fraction of Stimuli Negatively Perceived</i> | <i>Disruption</i> |

|                                                                                                          |                     |
|----------------------------------------------------------------------------------------------------------|---------------------|
| <i>; PinkNoise MDD(0)=0</i>                                                                              | <i>DepScore</i>     |
| <i>; PinkNoise Rum(0)=0</i>                                                                              | <i>RumScore</i>     |
| <i>Rum0= GET XLS CONSTANTS( 'AdolescentData.xlsx' , 'Sheet1' , 'B3')</i>                                 | <i>RumScore</i>     |
| <i>Rumination=SMOOTH(Indicated Rumination, Minimum Adjustment time/(1-<math>\Theta</math>5) , Rum0 )</i> | <i>RumScore</i>     |
| <i>RumResidualMean=0</i>                                                                                 | <i>RumScore</i>     |
| <i>RumSwitch=0</i>                                                                                       | <i>Dmnl</i>         |
| <i>Ongoing stressors=GET XLS CONSTANTS( 'AdolescentData.xlsx' , 'Sheet1' , 'B6')</i>                     | <i>engram/Month</i> |
| <i>; past stressors kept alive (0)=Adjusted Stressor0</i>                                                | <i>engram</i>       |

|                                                                                                                                                                                                     |                          |
|-----------------------------------------------------------------------------------------------------------------------------------------------------------------------------------------------------|--------------------------|
| Stressor0=GET XLS CONSTANTS( 'AdolescentData.xlsx' , 'Sheet1' , 'B5')                                                                                                                               | engram                   |
| TIME STEP = 0.03125                                                                                                                                                                                 | Month                    |
| <i>WhiteNoise MDD=RANDOM NORMAL( -10 , 10 , MDDResidualMean , 1 , NoiseSeedMDD )*((<math>\Theta 11^2</math>)*(2-(TIME STEP/ <math>\Theta 12</math>)) / (TIME STEP/ <math>\Theta 12</math>))^0.5</i> | <i>DepScore</i>          |
| <i>The formulation of white noise and pink noise are taken from Sterman (2000).</i>                                                                                                                 |                          |
| <i>WhiteNoise Rum=RANDOM NORMAL( -10 , 10 , RumResidualMean , 1 , NoiseSeedRum )*((<math>\Theta 10^2</math>)*(2-(TIME STEP/ <math>\Theta 12</math>)) / (TIME STEP/ <math>\Theta 12</math>))^0.5</i> | <i>RumScore</i>          |
| <i><math>\Theta 1=-1.2504</math></i>                                                                                                                                                                | <i>RumScore</i>          |
| <i><math>\Theta 2=0.4236</math></i>                                                                                                                                                                 | <i>RumScore/DepScore</i> |
| <i><math>\Theta 3=2.5152</math></i>                                                                                                                                                                 | <i>RumScore</i>          |

|                      |                            |
|----------------------|----------------------------|
| $\theta_4=0.2518$    | <i>RumScore/Disruption</i> |
| $\theta_5=0.1639$    | <i>Dmnl</i>                |
| $\theta_6=0.3730$    | <i>DepScore</i>            |
| $\theta_7=0.0699$    | <i>DepScore/RumScore</i>   |
| $\theta_8=0.8894$    | <i>Dmnl</i>                |
| $\theta_9=1.4741$    | <i>1/ RumScore</i>         |
| $\theta_{10}=7.8735$ | <i>Dmnl</i>                |
| $\theta_{11}=0.0002$ | <i>Dmnl</i>                |

$\theta_{12}=1.6008$

*Month*
